# Supplementary material
Source: Springer Nature journal article supplement (https://www.springermedizin.de/resource/supplementary/12916_2010_357_MOESM9_ESM.pdf/9599934)

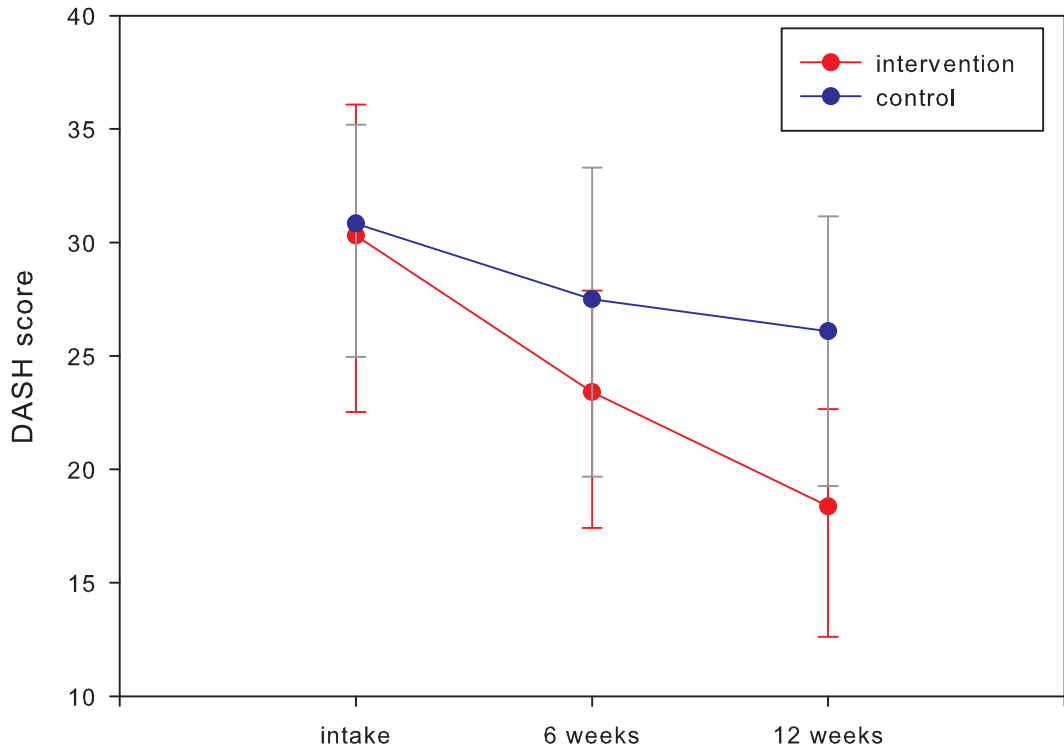

Supplement: MOESM9 [file 9599934]
